# Supplementary material for: Oligodontia in the Clinical Spectrum of Syndromes: A Systematic Review
Source: MDPI journal article supplement (doi:10.3390/dj11120279), 2023-12-04
Supplement: s1 [file s1]

**Supplementary Table 1.** Search strategies with appropriated key words and MeSH terms.

| Database       | Search strategies<br>(search date: August 8, 2023)                                                                                                                                                                                                                                                                                                                                                                                                               | Total |
|----------------|------------------------------------------------------------------------------------------------------------------------------------------------------------------------------------------------------------------------------------------------------------------------------------------------------------------------------------------------------------------------------------------------------------------------------------------------------------------|-------|
| LILACS         | (tw:("Syndrome oligodontia" OR "syndromes oligodontia" OR "Syndromic oligodontia" OR "oligodontia sindoromica" OR "sindrome oligodontia" OR "sindromes oligodontia" OR "sindrome oligodoncia" OR "oligodoncia sindromica" OR "sindromes oligodoncia" OR "LTBP3" OR "WNT10A" OR "EDARADD" OR "EDA" OR "IKBKG" OR "MSX1" OR "AXIN2")) AND (tw:(anodontismo OR anodontia OR Oligodontia OR "Severe hypodontia" OR anodoncia OR oligodoncia OR "hipodontia severa")) | 27    |
| Embase         | ('anodontia'/exp OR 'anodontia' OR 'oligodontia'/exp OR 'oligodontia' OR 'severe hypodontia') AND ('syndrome oligodontia' OR 'syndromes oligodontia' OR 'syndromic oligodontia' OR 'ltbp3' OR 'wnt10a' OR 'edaradd' OR 'eda'/exp OR 'eda' OR 'ikbkg' OR 'msx1' OR 'axin2'/exp OR 'axin2')                                                                                                                                                                        | 319   |
| PubMed         | ("Syndrome oligodontia" OR "syndromes oligodontia" OR "Syndromic oligodontia" OR "LTBP3" OR "WNT10A" OR "EDARADD" OR "EDA" OR "IKBKG" OR "MSX1" OR "AXIN2") AND ("anodontia"[MeSH Terms] OR "anodontia" OR "Oligodontia" OR "Severe hypodontia")                                                                                                                                                                                                                 | 1300  |
| Scopus         | TITLE-ABS-KEY("Syndrome oligodontia" OR "syndromes oligodontia" OR "Syndromic oligodontia" OR "LTBP3" OR "WNT10A" OR "EDARADD" OR "EDA" OR "IKBKG" OR "MSX1" OR "AXIN2") AND TITLE-ABS-KEY("anodontia" OR "Oligodontia" OR "Severe hypodontia")                                                                                                                                                                                                                  | 412   |
| Livivo         | ("Syndrome oligodontia" OR "syndromes oligodontia" OR "Syndromic oligodontia" OR "LTBP3" OR "WNT10A" OR "EDARADD" OR "EDA" OR "IKBKG" OR "MSX1" OR "AXIN2") AND ("anodontia" OR "Oligodontia" OR "Severe hypodontia")                                                                                                                                                                                                                                            | 151   |
| Web of Science | TS=(Syndrome oligodontia OR syndromes oligodontia OR Syndromic oligodontia OR LTBP3 OR WNT10A OR EDARADD OR EDA OR IKBKG OR MSX1 OR AXIN2) AND TS=(anodontia OR Oligodontia OR Severe hypodontia)                                                                                                                                                                                                                                                                | 360   |

|                |                                                                                                                                                                                                                                                  |    |
|----------------|--------------------------------------------------------------------------------------------------------------------------------------------------------------------------------------------------------------------------------------------------|----|
| Google Scholar | ("Syndrome oligodontia" OR "syndromes oligodontia" OR "Syndromic oligodontia" OR "LTBP3" OR "WNT10A" OR "EDARADD" OR "EDA" OR "IKBKG" OR "MSX1" OR "AXIN2") AND ("anodontia"[MeSH Terms] OR "anodontia" OR "Oligodontia" OR "Severe hypodontia") | 74 |
| Open Grey      | Oligodontia                                                                                                                                                                                                                                      | 7  |

**Supplementary Table 2.** Risk of bias assessment of the individual articles included (n:84)

| Authors / Year                    | 1. Were patient's demographic characteristics clearly described? | 2. Was the patient's history clearly described and presented as a timeline? | 3. Was the current clinical condition of the patient on presentation clearly described? | 4. Were diagnostic tests or assessment methods and the results clearly described? | 5. Was the intervention(s) or treatment procedure(s) clearly described? | 6. Was the post-intervention clinical condition clearly described? | 7. Were adverse events (harms) or unanticipated events identified and described? | 8. Does the case report/series provide takeaway lessons? |
|-----------------------------------|------------------------------------------------------------------|-----------------------------------------------------------------------------|-----------------------------------------------------------------------------------------|-----------------------------------------------------------------------------------|-------------------------------------------------------------------------|--------------------------------------------------------------------|----------------------------------------------------------------------------------|----------------------------------------------------------|
| Abdulla et al., 2019              | Unclear                                                          | Yes                                                                         | Yes                                                                                     | Yes                                                                               | Not applicable                                                          | Not applicable                                                     | Not applicable                                                                   | Yes                                                      |
| Abs et al., 1994                  | Yes                                                              | Yes                                                                         | Yes                                                                                     | no                                                                                | Not applicable                                                          | Not applicable                                                     | Not applicable                                                                   | Yes                                                      |
| Aditya et al., 2011               | Yes                                                              | Yes                                                                         | Yes                                                                                     | Yes                                                                               | Not applicable                                                          | Not applicable                                                     | Not applicable                                                                   | Yes                                                      |
| Agarwal et al., 2014              | Yes                                                              | Yes                                                                         | Yes                                                                                     | Yes                                                                               | Not applicable                                                          | Not applicable                                                     | Not applicable                                                                   | Yes                                                      |
| Aminabadi et al., 2010            | Yes                                                              | Yes                                                                         | Yes                                                                                     | Yes                                                                               | Not applicable                                                          | Not applicable                                                     | Not applicable                                                                   | Yes                                                      |
| Ann Drum et al., 1985             | Yes                                                              | Yes                                                                         | Yes                                                                                     | Yes                                                                               | Not applicable                                                          | Not applicable                                                     | Not applicable                                                                   | Yes                                                      |
| Ardila and Álvarez-Martínez, 2022 | No                                                               | Yes                                                                         | Yes                                                                                     | Yes                                                                               | Not applicable                                                          | Not applicable                                                     | Not applicable                                                                   | Yes                                                      |
| Arora et al., 2016                | Yes                                                              | Yes                                                                         | Yes                                                                                     | Yes                                                                               | Not applicable                                                          | Not applicable                                                     | Not applicable                                                                   | Yes                                                      |
| Awadh et al., 2016                | Yes                                                              | Yes                                                                         | Yes                                                                                     | Yes                                                                               | Not applicable                                                          | Not applicable                                                     | Not applicable                                                                   | Yes                                                      |
| Barber et al., 2012               | Yes                                                              | Yes                                                                         | Yes                                                                                     | Yes                                                                               | Not applicable                                                          | Not applicable                                                     | Not applicable                                                                   | Yes                                                      |

|                                     |     |         |     |         |                |                |                |     |
|-------------------------------------|-----|---------|-----|---------|----------------|----------------|----------------|-----|
| Bekiesinska-Figatowska et al., 2010 | Yes | Yes     | Yes | Yes     | Not applicable | Not applicable | Not applicable | Yes |
| Bergendal, 2001                     | Yes | Yes     | Yes | Unclear | Not applicable | Not applicable | Not applicable | Yes |
| Bergendal et al., 2015              | Yes | Yes     | Yes | Yes     | Not applicable | Not applicable | Not applicable | Yes |
| Bildik et al., 2012                 | Yes | Yes     | Yes | Yes     | Not applicable | Not applicable | Not applicable | Yes |
| Blankenstein et al., 2001           | Yes | Yes     | Yes | Yes     | Not applicable | Not applicable | Not applicable | Yes |
| Cagetti et al., 2019                | Yes | Yes     | Yes | Unclear | Not applicable | Not applicable | Not applicable | Yes |
| Callanan et al., 2006               | Yes | Yes     | Yes | Unclear | Not applicable | Not applicable | Not applicable | Yes |
| Carvalho et al., 2013               | Yes | no      | Yes | no      | Not applicable | Not applicable | Not applicable | Yes |
| Chalabreysse et al., 2011           | Yes | Yes     | Yes | Yes     | Not applicable | Not applicable | Not applicable | Yes |
| Cho et al., 2004                    | Yes | Yes     | Yes | Yes     | Not applicable | Not applicable | Not applicable | Yes |
| Clauss et al., 2014                 | Yes | Yes     | Yes | Yes     | Not applicable | Not applicable | Not applicable | Yes |
| Cogulu and Ertugrul, 2007           | Yes | no      | Yes | no      | Not applicable | Not applicable | Not applicable | Yes |
| Cogulu and Ertugrul, 2007           | Yes | no      | Yes | no      | Not applicable | Not applicable | Not applicable | Yes |
| Costa et al., 2022                  | Yes | No      | Yes | No      | Not applicable | Not applicable | Not applicable | Yes |
| Dall'oca et al., 2008               | Yes | Unclear | Yes | Yes     | Not applicable | Not applicable | Not applicable | Yes |

|                           |     |     |     |         |                |                |                |     |
|---------------------------|-----|-----|-----|---------|----------------|----------------|----------------|-----|
| Devadas et al., 2005      | Yes | Yes | Yes | Yes     | Not applicable | Not applicable | Not applicable | Yes |
| Downing and Welbury, 1992 | Yes | Yes | Yes | Unclear | Not applicable | Not applicable | Not applicable | Yes |
| Dunbar et al., 2015       | Yes | Yes | Yes | Yes     | Not applicable | Not applicable | Not applicable | Yes |
| Emral and Akcam, 2009     | Yes | Yes | Yes | Yes     | Not applicable | Not applicable | Not applicable | Yes |
| Fan et al., 2019          | Yes | Yes | Yes | Yes     | Not applicable | Not applicable | Not applicable | Yes |
| Ghosh et al., 2019        | Yes | Yes | Yes | Yes     | Not applicable | Not applicable | Not applicable | Yes |
| Gupta, 2012               | Yes | Yes | Yes | no      | Not applicable | Not applicable | Not applicable | Yes |
| Hasan et al., 2019        | Yes | Yes | Yes | no      | Not applicable | Not applicable | Not applicable | Yes |
| Hassona et al., 2018      | Yes | Yes | Yes | Yes     | Not applicable | Not applicable | Not applicable | Yes |
| Hattab et al., 1996       | Yes | Yes | Yes | Unclear | Not applicable | Not applicable | Not applicable | Yes |
| Hattab et al., 1997       | Yes | Yes | Yes | Unclear | Not applicable | Not applicable | Not applicable | Yes |
| Hingston et al., 2006     | Yes | Yes | Yes | Yes     | Not applicable | Not applicable | Not applicable | Yes |
| Jain et al., 2010         | Yes | Yes | Yes | Yes     | Not applicable | Not applicable | Not applicable | Yes |
| Jain et al., 2012         | Yes | Yes | Yes | Yes     | Not applicable | Not applicable | Not applicable | Yes |
| Kale et al., 2013         | Yes | no  | No  | Yes     | Not applicable | Not applicable | Not applicable | Yes |

|                                      |     |         |         |         |                |                |                |     |
|--------------------------------------|-----|---------|---------|---------|----------------|----------------|----------------|-----|
| Kantaputra et al., 2013              | Yes | Yes     | Yes     | Yes     | Not applicable | Not applicable | Not applicable | Yes |
| Kaul and Redd, 2008                  | Yes | Yes     | Yes     | Unclear | Not applicable | Not applicable | Not applicable | Yes |
| Kawamoto, Motohashi and Ohyama, 2004 | Yes | Unclear | Yes     | Yes     | Not applicable | Not applicable | Not applicable | Yes |
| Khabour et al., 2010                 | Yes | Yes     | Yes     | Yes     | Not applicable | Not applicable | Not applicable | Yes |
| Khurana et al., 2010                 | No  | Unclear | Unclear | Yes     | Not applicable | Not applicable | Not applicable | Yes |
| Kinyo et al., 2013                   | Yes | Yes     | Yes     | Yes     | Not applicable | Not applicable | Not applicable | Yes |
| Kishore et al., 2014                 | Yes | Yes     | Yes     | Yes     | Not applicable | Not applicable | Not applicable | Yes |
| Kobayashi et al., 2022               | No  | Yes     | Yes     | Yes     | Not applicable | Not applicable | Not applicable | Yes |
| Kozma et al., 1999                   | Yes | Yes     | Yes     | Yes     | Not applicable | Not applicable | Not applicable | Yes |
| Kramer et al., 2005                  | Yes | Yes     | Yes     | Yes     | Not applicable | Not applicable | Not applicable | Yes |
| Kroigard et al., 2016                | Yes | Yes     | Yes     | Yes     | Not applicable | Not applicable | Not applicable | Yes |
| Levy et al., 2020                    | Yes | Yes     | Yes     | Yes     | Not applicable | Not applicable | Not applicable | Yes |
| Liedén et al., 2016                  | Yes | Yes     | Yes     | Yes     | Not applicable | Not applicable | Not applicable | Yes |
| Lin et al., 2022                     | No  | Yes     | Yes     | Yes     | Not applicable | Not applicable | Not applicable | Yes |

|                              |     |         |     |         |                |                |                |     |
|------------------------------|-----|---------|-----|---------|----------------|----------------|----------------|-----|
| <u>Martinho</u> et al., 2019 | Yes | Yes     | Yes | Yes     | Not applicable | Not applicable | Not applicable | Yes |
| Marvin et al., 2011          | Yes | Yes     | Yes | Yes     | Not applicable | Not applicable | Not applicable | Yes |
| Murata et al., 2019          | Yes | Yes     | Yes | Yes     | Not applicable | Not applicable | Not applicable | Yes |
| O'Dwyer and Jones, 2005      | Yes | no      | No  | no      | Not applicable | Not applicable | Not applicable | Yes |
| Pipa Vallejo et al., 2008    | Yes | Yes     | Yes | Unclear | Not applicable | Not applicable | Not applicable | Yes |
| Reiche et al., 2014          | Yes | Unclear | Yes | Yes     | Not applicable | Not applicable | Not applicable | Yes |
| Retna and Sockalingnam, 2013 | Yes | Unclear | Yes | Yes     | Not applicable | Not applicable | Not applicable | Yes |
| Richieri-Costa et al., 1993  | Yes | Yes     | Yes | Yes     | Not applicable | Not applicable | Not applicable | Yes |
| Rizos et al., 1998           | Yes | Yes     | Yes | Yes     | Not applicable | Not applicable | Not applicable | Yes |
| Rock and McLellan, 2016      | Yes | Yes     | Yes | Yes     | Not applicable | Not applicable | Not applicable | Yes |
| Shen et al., 2011            | Yes | Yes     | Yes | Yes     | Not applicable | Not applicable | Not applicable | Yes |
| Siddiqui et al., 2021        | No  | Yes     | Yes | Yes     | Not applicable | Not applicable | Not applicable | Yes |
| Sikora et al., 2006          | Yes | Yes     | Yes | Unclear | Not applicable | Not applicable | Not applicable | Yes |
| Singh et al., 2017           | Yes | Yes     | Yes | Yes     | Not applicable | Not applicable | Not applicable | Yes |

|                               |     |     |     |         |                |                |                |     |
|-------------------------------|-----|-----|-----|---------|----------------|----------------|----------------|-----|
| Subramaniam and Neeraja, 2008 | Yes | Yes | Yes | Yes     | Not applicable | Not applicable | Not applicable | Yes |
| Suda et al., 2010             | Yes | No  | No  | Yes     | Not applicable | Not applicable | Not applicable | Yes |
| Sultan et al., 2020           | Yes | Yes | Yes | Unclear | Not applicable | Not applicable | Not applicable | Yes |
| Sun et al., 2019              | Yes | Yes | Yes | Yes     | Not applicable | Not applicable | Not applicable | Yes |
| Talasila et al., 2017         | No  | Yes | Yes | Yes     | Not applicable | Not applicable | Not applicable | Yes |
| Tanboga et al., 2001          | Yes | Yes | Yes | Yes     | Not applicable | Not applicable | Not applicable | Yes |
| Tanboga et al., 1992          | Yes | Yes | Yes | Unclear | Not applicable | Not applicable | Not applicable | Yes |
| Tao et al., 2010              | Yes | Yes | Yes | Yes     | Not applicable | Not applicable | Not applicable | Yes |
| Tosun et al., 2006            | Yes | Yes | Yes | No      | Not applicable | Not applicable | Not applicable | Yes |
| Tuna et al., 2008/ Turkey     | Yes | Yes | Yes | no      | Not applicable | Not applicable | Not applicable | Yes |
| Tuna et al., 2009             | Yes | Yes | Yes | Yes     | Not applicable | Not applicable | Not applicable | Yes |
| Tuna et al., 2012             | Yes | Yes | Yes | Yes     | Not applicable | Not applicable | Not applicable | Yes |
| Vasudevan and Sinha, 2023     | No  | Yes | Yes | Yes     | Not applicable | Not applicable | Not applicable | Yes |
| Waldron et al., 2010          | Yes | Yes | Yes | no      | Not applicable | Not applicable | Not applicable | Yes |
| Yin et al., 2013              | Yes | Yes | Yes | Yes     | Not applicable | Not applicable | Not applicable | Yes |



|                           |     |     |     |    |                |                |                |     |
|---------------------------|-----|-----|-----|----|----------------|----------------|----------------|-----|
| Zidane and Alloussi, 2022 | Yes | Yes | Yes | No | Not applicable | Not applicable | Not applicable | Yes |
|---------------------------|-----|-----|-----|----|----------------|----------------|----------------|-----|

**Supplementary Table 3.** Biological processes characterized with the list of altered genes in syndromes with oligodontia.

| #term ID   | Term description                   | Observed gene count | Background gene count | False discovery rate | Matching proteins in your network                                        |
|------------|------------------------------------|---------------------|-----------------------|----------------------|--------------------------------------------------------------------------|
| GO:0042476 | Odontogenesis                      | 7                   | 126                   | 1.56e-07             | WNT10A,LEF1,AXIN2,EDA,MSX1,FGFR2,PITX2                                   |
| GO:0048732 | Gland development                  | 8                   | 419                   | 7.29e-06             | WNT10A,CDH1,LEF1,PTCH1,EDA,MSX1,FGFR2,PITX2                              |
| GO:0060429 | Epithelium development             | 10                  | 1069                  | 1.65e-05             | WNT10A,LEF1,AXIN2,NPHP1,PTCH1,EDA,DSP,MSX1,FGFR2,PITX2                   |
| GO:0003007 | Heart morphogenesis                | 6                   | 247                   | 0.00015              | AXIN2,PTCH1,DSP,MSX1,FGFR2,PITX2                                         |
| GO:0009887 | Animal organ morphogenesis         | 9                   | 997                   | 0.00015              | WNT10A,LEF1,AXIN2,PTCH1,EDA,DSP,MSX1,FGFR2,PITX2                         |
| GO:0003002 | Regionalization                    | 6                   | 341                   | 0.00054              | LEF1,AXIN2,PTCH1,MSX1,FGFR2,PITX2                                        |
| GO:0008544 | Epidermis development              | 6                   | 320                   | 0.00054              | WNT10A,PTCH1,EDA,DSP,FGFR2,PITX2                                         |
| GO:0009653 | Anatomical structure morphogenesis | 11                  | 2229                  | 0.00054              | WNT10A,LEF1,AXIN2,NPHP1,PTCH1,EDA,DSP,MSX1,FGFR2,TBCE,PITX2              |
| GO:0030154 | Cell differentiation               | 13                  | 3507                  | 0.00054              | WNT10A,CDH1,LEF1,AXIN2,NPHP1,PTCH1,EDARADD,EDA,DSP,MSX1,FGFR2,TBCE,PITX2 |
| GO:0048729 | Tissue morphogenesis               | 7                   | 565                   | 0.00054              | WNT10A,LEF1,NPHP1,PTCH1,DSP,MSX1,FGFR2                                   |
| GO:0048762 | Mesenchymal cell differentiation   | 5                   | 170                   | 0.00054              | WNT10A,LEF1,MSX1,FGFR2,PITX2                                             |
| GO:0060173 | Limb development                   | 5                   | 180                   | 0.00054              | LEF1,PTCH1,MSX1,FGFR2,PITX2                                              |
| GO:0030879 | Mammary gland development          | 4                   | 128                   | 0.0037               | LEF1,PTCH1,MSX1,FGFR2                                                    |

|            |                                                              |    |      |        |                                                                          |
|------------|--------------------------------------------------------------|----|------|--------|--------------------------------------------------------------------------|
| GO:0061153 | Trachea gland development                                    | 2  | 2    | 0.0037 | LEF1,EDA                                                                 |
| GO:0072359 | Circulatory system development                               | 7  | 901  | 0.0040 | LEF1,AXIN2,PTCH1,DSP,MSX1,FGFR2,PITX2                                    |
| GO:0007423 | Sensory organ development                                    | 6  | 577  | 0.0042 | WNT10A,LEF1,NPHP1,MSX1,FGFR2,PITX2                                       |
| GO:0035108 | Limb morphogenesis                                           | 4  | 144  | 0.0044 | LEF1,PTCH1,MSX1,FGFR2                                                    |
| GO:0048731 | System development                                           | 12 | 3867 | 0.0046 | WNT10A,CDH1,LEF1,AXIN2,NPHP1,PTCH1,EDA,DSP,MSX1,FGFR2,TBCE,PITX2         |
| GO:0071866 | Negative regulation of apoptotic process in bone marrow cell | 2  | 4    | 0.0061 | LEF1,FGFR2                                                               |
| GO:0048513 | Animal organ development                                     | 11 | 3246 | 0.0062 | WNT10A,CDH1,LEF1,AXIN2,NPHP1,PTCH1,EDA,DSP,MSX1,FGFR2,PITX2              |
| GO:0021873 | Forebrain neuroblast division                                | 2  | 5    | 0.0077 | LEF1,FGFR2                                                               |
| GO:0007166 | Cell surface receptor signaling pathway                      | 9  | 2040 | 0.0079 | WNT10A,LEF1,AXIN2,PTCH1,EVC2,EDA,MSX1,FGFR2,IKBKG                        |
| GO:0030900 | Forebrain development                                        | 5  | 391  | 0.0079 | CDH1,LEF1,MSX1,FGFR2,PITX2                                               |
| GO:0023052 | Signaling                                                    | 13 | 5057 | 0.0080 | WNT10A,LEF1,AXIN2,NPHP1,PTCH1,EDARADD,EVC2,PCNT,EDA,DSP,MSX1,FGFR2,IKBKG |
| GO:0048863 | Stem cell differentiation                                    | 4  | 183  | 0.0080 | WNT10A,MSX1,FGFR2,PITX2                                                  |
| GO:0008283 | Cell population proliferation                                | 6  | 712  | 0.0085 | LEF1,AXIN2,PTCH1,MSX1,FGFR2,PITX2                                        |
| GO:0071864 | Positive regulation of cell proliferation in bone marrow     | 2  | 6    | 0.0085 | LEF1,FGFR2                                                               |

|            |                                                        |    |      |        |                                                                          |
|------------|--------------------------------------------------------|----|------|--------|--------------------------------------------------------------------------|
| GO:0007154 | Cell communication                                     | 13 | 5165 | 0.0089 | WNT10A,LEF1,AXIN2,NPHP1,PTCH1,EDARADD,EVC2,PCNT,EDA,DSP,MSX1,FGFR2,IKBKG |
| GO:0061180 | Mammary gland epithelium development                   | 3  | 61   | 0.0089 | PTCH1,MSX1,FGFR2                                                         |
| GO:0048699 | Generation of neurons                                  | 7  | 1131 | 0.0096 | WNT10A,CDH1,LEF1,PTCH1,FGFR2,TBCE,PITX2                                  |
| GO:0010604 | Positive regulation of macromolecule metabolic process | 11 | 3533 | 0.0099 | WNT10A,CDH1,SrcAP,LEF1,AXIN2,PTCH1,EDA,MSX1,FGFR2,IKBKG,PITX2            |
| GO:0002009 | Morphogenesis of an epithelium                         | 5  | 457  | 0.0117 | WNT10A,LEF1,NPHP1,PTCH1,FGFR2                                            |
| GO:0007420 | Brain development                                      | 6  | 775  | 0.0117 | CDH1,LEF1,PTCH1,MSX1,FGFR2,PITX2                                         |
| GO:0048568 | Embryonic organ development                            | 5  | 454  | 0.0117 | LEF1,PTCH1,MSX1,FGFR2,PITX2                                              |
| GO:0060348 | Bone development                                       | 4  | 216  | 0.0117 | AXIN2,MSX1,FGFR2,PITX2                                                   |
| GO:0045893 | Positive regulation of transcription, DNA-templated    | 8  | 1710 | 0.0129 | CDH1,SrcAP,LEF1,PTCH1,MSX1,FGFR2,IKBKG,PITX2                             |
| GO:0001837 | Epithelial to mesenchymal transition                   | 3  | 79   | 0.0141 | LEF1,MSX1,FGFR2                                                          |
| GO:0001942 | Hair follicle development                              | 3  | 80   | 0.0141 | WNT10A,EDA,FGFR2                                                         |
| GO:0061053 | Somite development                                     | 3  | 82   | 0.0149 | LEF1,AXIN2,PTCH1                                                         |
| GO:0042475 | Odontogenesis of dentin-containing tooth               | 3  | 83   | 0.0151 | LEF1,EDA,MSX1                                                            |

|            |                                                          |    |      |        |                                                                                    |
|------------|----------------------------------------------------------|----|------|--------|------------------------------------------------------------------------------------|
| GO:0050896 | Response to stimulus                                     | 15 | 7835 | 0.0152 | WNT10A,CDH1,LEF1,AXIN2,NPHP1,PTCH1,EDARADD,EVC2,PCNT,EDA,DSP,MSX1,FGFR2,TBCE,IKBKG |
| GO:0007165 | Signal transduction                                      | 12 | 4714 | 0.0162 | WNT10A,LEF1,AXIN2,NPHP1,PTCH1,EDARADD,EVC2,PCNT,EDA,MSX1,FGFR2,IKBKG               |
| GO:0043588 | Skin development                                         | 4  | 266  | 0.0174 | WNT10A,EDA,DSP,FGFR2                                                               |
| GO:0016055 | Wnt signaling pathway                                    | 4  | 284  | 0.0206 | WNT10A,LEF1,AXIN2,EDA                                                              |
| GO:0048646 | Anatomical structure formation involved in morphogenesis | 6  | 938  | 0.0206 | LEF1,AXIN2,PTCH1,EDA,MSX1,FGFR2                                                    |
| GO:0060070 | Canonical Wnt signaling pathway                          | 3  | 100  | 0.0206 | WNT10A,LEF1,EDA                                                                    |
| GO:0060349 | Bone morphogenesis                                       | 3  | 100  | 0.0206 | AXIN2,MSX1,FGFR2                                                                   |
| GO:0022612 | Gland morphogenesis                                      | 3  | 104  | 0.0212 | PTCH1,EDA,FGFR2                                                                    |
| GO:0071310 | Cellular response to organic substance                   | 8  | 2019 | 0.0267 | WNT10A,CDH1,LEF1,AXIN2,PTCH1,EDA,MSX1,FGFR2                                        |
| GO:0010092 | Specification of animal organ identity                   | 2  | 18   | 0.0272 | AXIN2,FGFR2                                                                        |
| GO:0042481 | Regulation of odontogenesis                              | 2  | 18   | 0.0272 | WNT10A,MSX1                                                                        |
| GO:0030111 | Regulation of Wnt signaling pathway                      | 4  | 326  | 0.0289 | LEF1,AXIN2,EDA,FGFR2                                                               |
| GO:0030326 | Embryonic limb morphogenesis                             | 3  | 120  | 0.0289 | LEF1,PTCH1,MSX1                                                                    |
| GO:0043586 | Tongue development                                       | 2  | 20   | 0.0289 | WNT10A,LEF1                                                                        |

|                   |                                                   |    |      |        |                                                                           |
|-------------------|---------------------------------------------------|----|------|--------|---------------------------------------------------------------------------|
| <b>GO:0060537</b> | Muscle tissue development                         | 4  | 323  | 0.0289 | PTCH1,DSP,MSX1,FGFR2                                                      |
| <b>GO:0009790</b> | Embryo development                                | 6  | 1049 | 0.0300 | LEF1,AXIN2,PTCH1,MSX1,FGFR2,PITX2                                         |
| <b>GO:0045667</b> | Regulation of osteoblast differentiation          | 3  | 125  | 0.0300 | AXIN2,PTCH1,FGFR2                                                         |
| <b>GO:0030182</b> | Neuron differentiation                            | 6  | 1062 | 0.0314 | WNT10A,CDH1,PTCH1,FGFR2,TBCE,PITX2                                        |
| <b>GO:0043009</b> | Chordate embryonic development                    | 5  | 654  | 0.0314 | LEF1,AXIN2,PTCH1,MSX1,FGFR2                                               |
| <b>GO:0048518</b> | Positive regulation of biological process         | 13 | 6207 | 0.0314 | WNT10A,CDH1,SRCAP,LEF1,AXIN2,NPHP1,PTCH1,PCNT,EDA,MSX1,FGFR2,IKBKG,PITX2  |
| <b>GO:0010839</b> | Negative regulation of keratinocyte proliferation | 2  | 22   | 0.0319 | PTCH1,FGFR2                                                               |
| <b>GO:0060713</b> | Labyrinthine layer morphogenesis                  | 2  | 22   | 0.0319 | LEF1,FGFR2                                                                |
| <b>GO:0048754</b> | Branching morphogenesis of an epithelial tube     | 3  | 134  | 0.0340 | LEF1,PTCH1,FGFR2                                                          |
| <b>GO:0007399</b> | Nervous system development                        | 8  | 2188 | 0.0360 | WNT10A,CDH1,LEF1,PTCH1,MSX1,FGFR2,TBCE,PITX2                              |
| <b>GO:0071495</b> | Cellular response to endogenous stimulus          | 6  | 1103 | 0.0360 | WNT10A,CDH1,LEF1,AXIN2,MSX1,FGFR2                                         |
| <b>GO:0030177</b> | Positive regulation of Wnt signaling pathway      | 3  | 141  | 0.0374 | LEF1,EDA,FGFR2                                                            |
| <b>GO:0051716</b> | Cellular response to stimulus                     | 13 | 6357 | 0.0374 | WNT10A,CDH1,LEF1,AXIN2,NPHP1,PTCH1,EDARADD,EVC2,PCNT,EDA,MSX1,FGFR2,IKBKG |

|            |                                         |    |      |        |                                                                   |
|------------|-----------------------------------------|----|------|--------|-------------------------------------------------------------------|
| GO:0000902 | Cell morphogenesis                      | 5  | 708  | 0.0401 | LEF1,PTCH1,MSX1,FGFR2,TBCE                                        |
| GO:0007435 | Salivary gland morphogenesis            | 2  | 27   | 0.0423 | EDA,FGFR2                                                         |
| GO:0010463 | Mesenchymal cell proliferation          | 2  | 27   | 0.0423 | MSX1,FGFR2                                                        |
| GO:0035148 | Tube formation                          | 3  | 150  | 0.0426 | PTCH1,EDA,FGFR2                                                   |
| GO:0030030 | Cell projection organization            | 6  | 1158 | 0.0431 | CDH1,NPHP1,PTCH1,PCNT,FGFR2,TBCE                                  |
| GO:0033688 | Regulation of osteoblast proliferation  | 2  | 28   | 0.0436 | AXIN2,FGFR2                                                       |
| GO:0001701 | In utero embryonic development          | 4  | 393  | 0.0450 | LEF1,PTCH1,MSX1,FGFR2                                             |
| GO:0051252 | Regulation of RNA metabolic process     | 10 | 3759 | 0.0471 | CDH1,SrcAP,LEF1,AXIN2,PTCH1,EDA,MSX1,FGFR2,IKBKG,PITX2            |
| GO:0048468 | Cell development                        | 7  | 1719 | 0.0478 | CDH1,LEF1,AXIN2,PTCH1,FGFR2,TBCE,PITX2                            |
| GO:0031069 | Hair follicle morphogenesis             | 2  | 31   | 0.0496 | WNT10A,FGFR2                                                      |
| GO:0048522 | Positive regulation of cellular process | 12 | 5584 | 0.0496 | CDH1,SrcAP,LEF1,AXIN2,NPHP1,PTCH1,PCNT,EDA,MSX1,FGFR2,IKBKG,PITX2 |
| GO:0060325 | Face morphogenesis                      | 2  | 31   | 0.0496 | LEF1,MSX1                                                         |
| GO:0060603 | Mammary gland duct morphogenesis        | 2  | 31   | 0.0496 | PTCH1,FGFR2                                                       |

**Supplementary Table 4.** Activated pathways characterized with syndromes with oligodontia.

| #term ID | Term description                                         | Observed gene count | Background gene count | False discovery rate | Matching proteins in your network        |
|----------|----------------------------------------------------------|---------------------|-----------------------|----------------------|------------------------------------------|
| hsa05200 | Pathways in cancer                                       | 7                   | 515                   | 4.55e-05             | WNT10A,CDH1,LEF1,AXIN2,PTCH1,FGFR2,IKBKG |
| hsa05217 | Basal cell carcinoma                                     | 4                   | 63                    | 4.55e-05             | WNT10A,LEF1,AXIN2,PTCH1                  |
| hsa05226 | Gastric cancer                                           | 5                   | 146                   | 4.55e-05             | WNT10A,CDH1,LEF1,AXIN2,FGFR2             |
| hsa04390 | Hippo signaling pathway                                  | 4                   | 154                   | 0.00073              | WNT10A,CDH1,LEF1,AXIN2                   |
| hsa05213 | Endometrial cancer                                       | 3                   | 58                    | 0.0012               | CDH1,LEF1,AXIN2                          |
| hsa04064 | NF-kappa B signaling pathway                             | 3                   | 101                   | 0.0046               | EDARADD,EDA,IKBKG                        |
| hsa05215 | Prostate cancer                                          | 3                   | 97                    | 0.0046               | LEF1,FGFR2,IKBKG                         |
| hsa04550 | Signaling pathways regulating pluripotency of stem cells | 3                   | 141                   | 0.0101               | WNT10A,AXIN2,FGFR2                       |
| hsa05224 | Breast cancer                                            | 3                   | 146                   | 0.0101               | WNT10A,LEF1,AXIN2                        |
| hsa04310 | Wnt signaling pathway                                    | 3                   | 154                   | 0.0102               | WNT10A,LEF1,AXIN2                        |
| hsa04934 | Cushing syndrome                                         | 3                   | 153                   | 0.0102               | WNT10A,LEF1,AXIN2                        |
| hsa05225 | Hepatocellular carcinoma                                 | 3                   | 161                   | 0.0102               | WNT10A,LEF1,AXIN2                        |
| hsa05216 | Thyroid cancer                                           | 2                   | 37                    | 0.0132               | CDH1,LEF1                                |



|                 |                                                 |   |     |        |                    |
|-----------------|-------------------------------------------------|---|-----|--------|--------------------|
| <b>hsa04340</b> | Hedgehog signaling pathway                      | 2 | 46  | 0.0185 | PTCH1,EVC2         |
| <b>hsa04520</b> | Adherens junction                               | 2 | 69  | 0.0355 | CDH1,LEF1          |
| <b>hsa05221</b> | Acute myeloid leukemia                          | 2 | 67  | 0.0355 | LEF1,IKBKG         |
| <b>hsa05412</b> | Arrhythmogenic right ventricular cardiomyopathy | 2 | 77  | 0.0410 | LEF1,DSP           |
| <b>hsa05210</b> | Colorectal cancer                               | 2 | 82  | 0.0437 | LEF1,AXIN2         |
| <b>hsa05165</b> | Human papillomavirus infection                  | 3 | 324 | 0.0457 | WNT10A,AXIN2,IKBKG |

---
